# Supplementary material
Source: PubMed Central journal article supplement (PMC1061609)

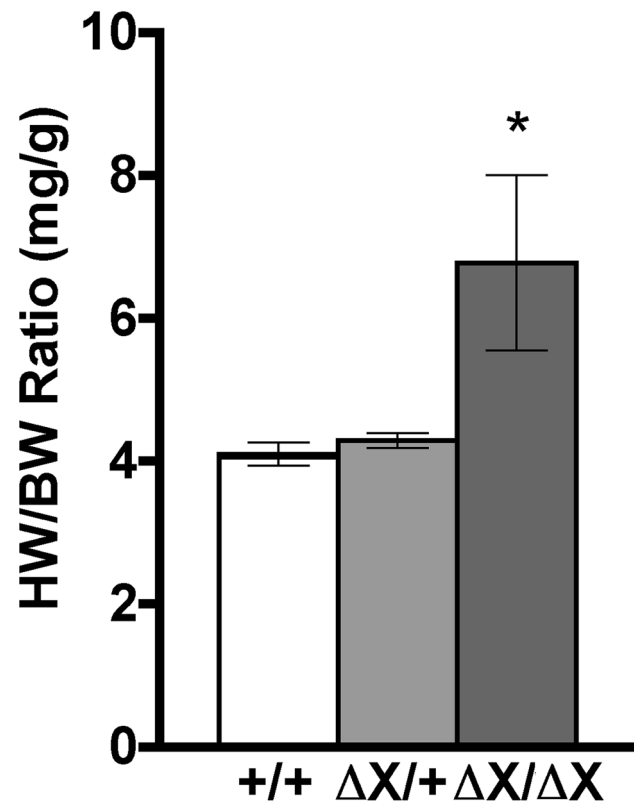

Tadano et al., Supplementary data 1

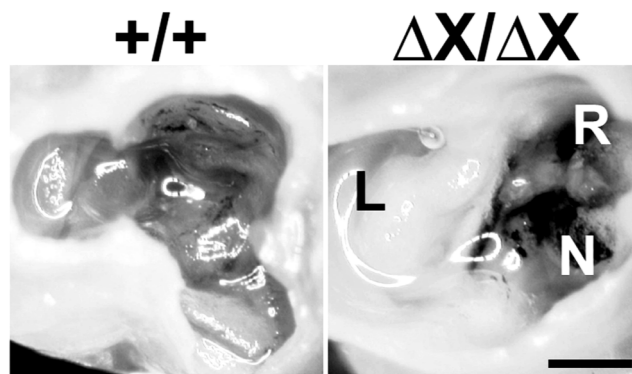

Tadano et al., Supplementary data 3

Supplement: molcellb_25_6_2191__1.pdf [file molcellb_25_6_2191__1.pdf]
